# Supplementary material for: Comprehensive assessment of miniature CRISPR-Cas12f nucleases for gene disruption
Source: PubMed Central journal article supplement (PMC9509373; doi:10.1038/s41467-022-33346-1), 2022-09-24
Supplement: 41467_2022_33346_MOESM1_ESM.pdf [file 41467_2022_33346_MOESM1_ESM.pdf]

# SUPPLEMENTARY INFORMATION

## Comprehensive assessment of miniature CRISPR-Cas12f nucleases for gene disruption

Changchang Xin<sup>1,2</sup>, Jianhang Yin<sup>1,2</sup>, Shaopeng Yuan<sup>1</sup>, Liqiong Ou<sup>1</sup>, Mengzhu Liu<sup>1</sup>, Weiwei Zhang<sup>1</sup>, Jiazhi Hu<sup>1,\*</sup>

### This PDF file includes:

**Supplemental Fig. 1** HEK293T-d2EGFP cells edited by several CRISPR-Cas nucleases

**Supplemental Fig. 2** Genome-wide editing off-targets of different Cas nucleases

**Supplemental Fig. 3** Cas12f nucleases caused a prevalent deletion accumulated at 2-11bp in length

**Supplemental Fig. 4** Repair outcomes and deletional junction's distribution at *FGF18* locus

**Supplemental Fig. 5** The insertion patterns of Cas12f and Cas9 nucleases

**Supplemental Table 1** The proportion of GFP negative cells in Cas nuclease-GFP disruption assay

**Supplemental Table 2** Bio-primer, Red-primer, and gRNA sequences used in PEM-seq assay

**Supplemental Table 3** Vector integrations detected by PEM-seq in this study

# Supplementary Fig.1

**a**

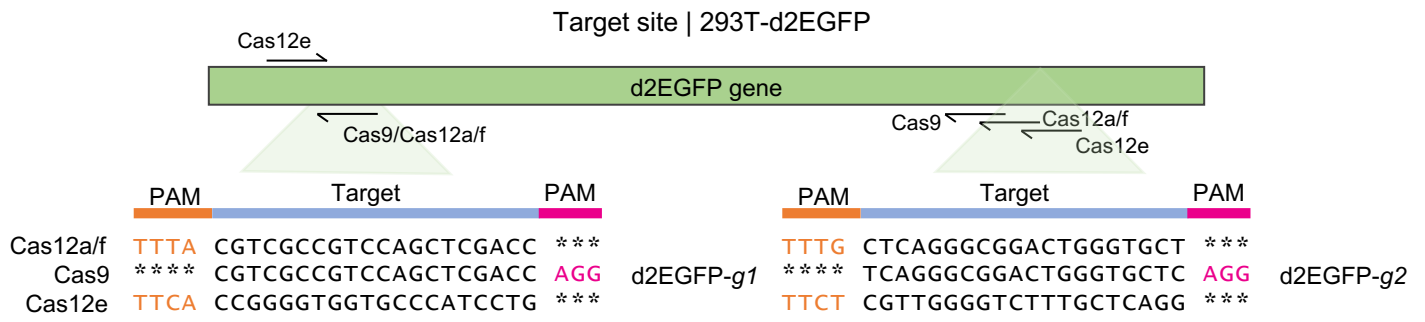

**b**

GFP disruption proportions | 293T | 3 repeats

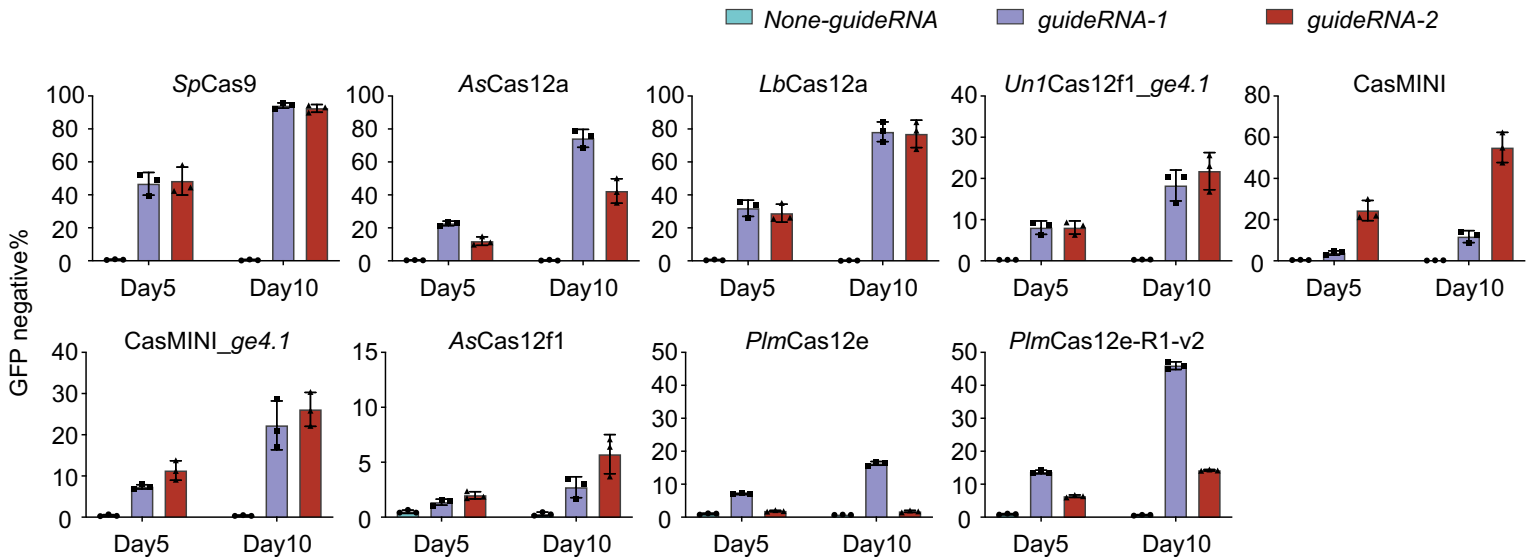

**c**

Flow chart of GFP disruption | 293T | Day10

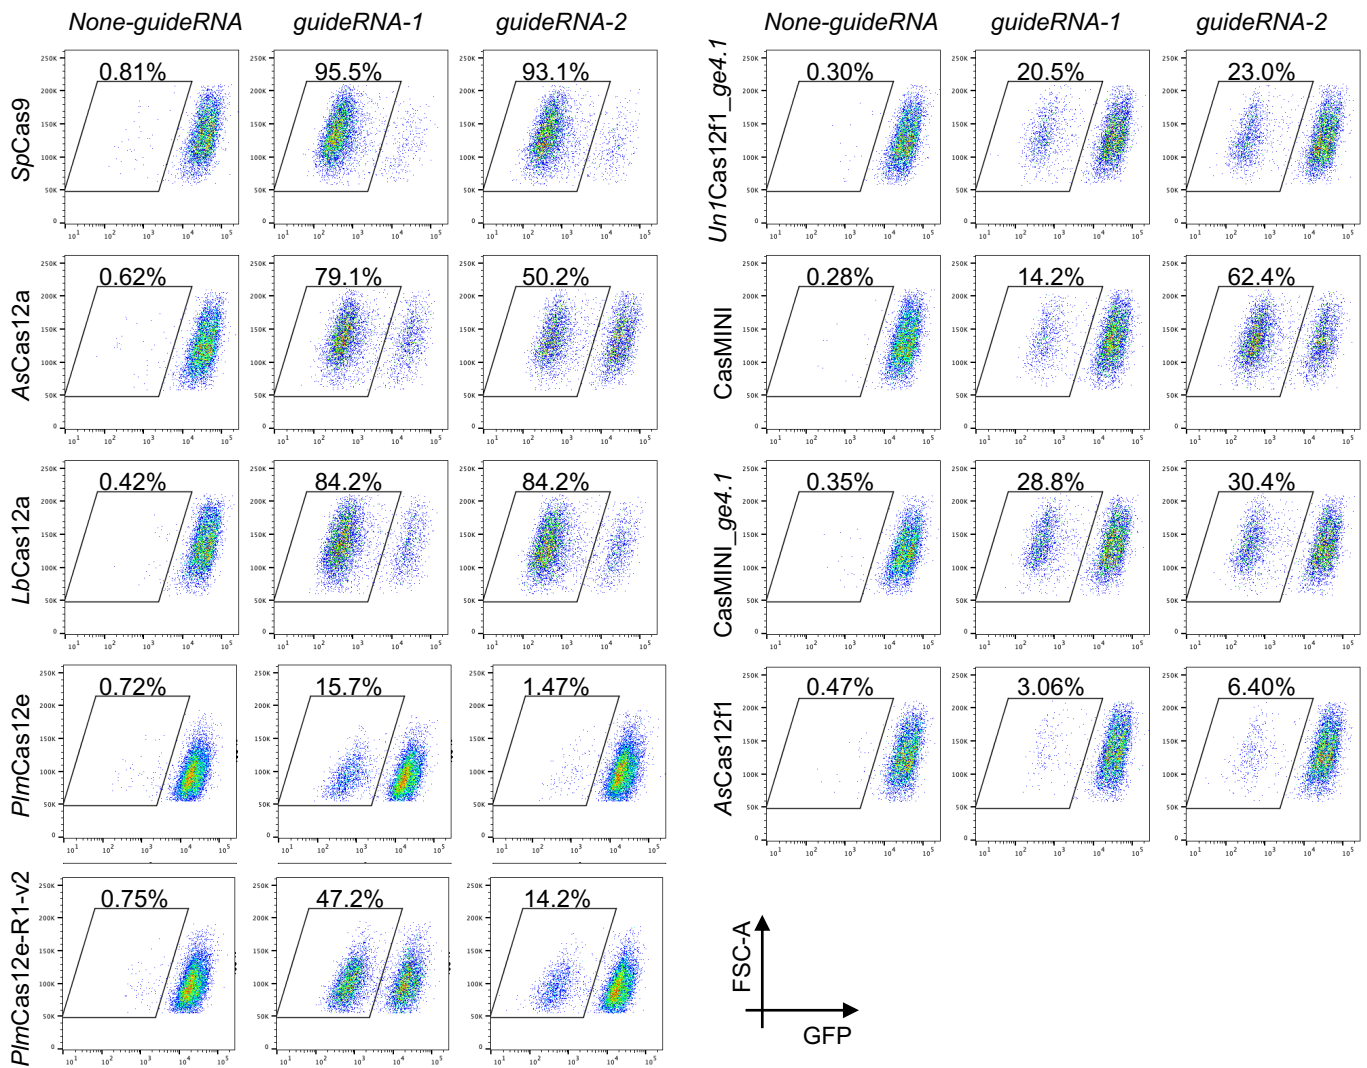

**Supplementary Figure 1. HEK293T-d2EGFP cells edited by several CRISPR-Cas nucleases. Related to Figure 1.**

(a) Map depicting the two target sites by Cas9, Cas12a, Cas12e, and Cas12f Cas nucleases within the EGFP gene for Fig. 1d. (b) The GFP disruption efficiencies of different Cas nucleases were shown at the indicated time points and target sites. The GFP disruption proportion is referred to as the number of GFP-negative cells relative to the total number of cells. 'None-guideRNA' represents nontargeting guide RNA. 'guideRNA1' and 'guideRNA2' indicate site 1 and site 2, respectively (N = 3, mean  $\pm$  SD from three biological replicates). (c) Representative raw flow cytometry data by different CRISPR/Cas systems in EGFP disruption assay, with gates showing how the GFP negative cells are gated and numbers above the gates indicating the GFP disruption proportions.

# Supplementary Fig.2

**a** FACS sorting gate  
293T | CasMINI-HBB

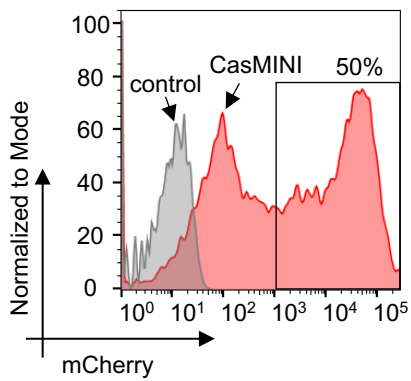

**b** Editing efficiencies  
293T | multiple loci

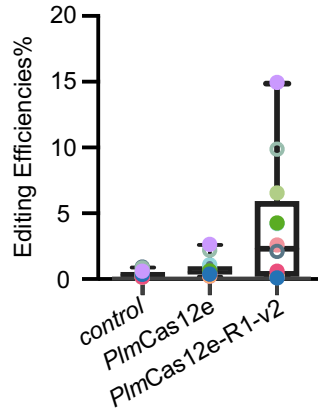

**c** Off-targets | 293T | multiple loci

|                         | Adjacent editing sites |         |     |              | Total |
|-------------------------|------------------------|---------|-----|--------------|-------|
|                         | VEGFA_1                | VEGFA_2 | HBB | IFN $\gamma$ |       |
| <i>SpCas9</i>           | –                      | 4       | 3   | 5            | 12    |
| <i>AsCas12a</i>         | –                      | 1       | –   | –            | 1     |
| <i>LbCas12a</i>         | –                      | 1       | –   | 1            | 2     |
| <i>Un1Cas12f1_ge4.1</i> | –                      | –       | –   | 1            | 1     |
| CasMINI                 | –                      | –       | –   | –            | 0     |
| CasMINI_ <i>ge4.1</i>   | –                      | –       | –   | 2            | 2     |
| <i>AsCas12f1</i>        | –                      | –       | –   | –            | 0     |

**d** Off-targets sequencing reads | multiple loci

**VEGFA\_2**

|                  | 20                   | 15 | 10 | 5 | 1 | PAM | counts |
|------------------|----------------------|----|----|---|---|-----|--------|
| <i>SpCas9</i> ON | GCTCTCAAGACCCACAATCC |    |    |   |   | AGG | 128467 |
| OT1              | TTTCTCAAGACCCACAATTC |    |    |   |   | AGG | 993    |
| OT2              | CAACTCAAGACCCACAAGCC |    |    |   |   | TGG | 561    |
| OT3              | CACCTCAGGACCCACAATCC |    |    |   |   | ATG | 3      |
| OT4              | ACTTCAAGTCACACAATCC  |    |    |   |   | TGG | 3      |

|                    | PAM  | 1                    | 5 | 10 | 15 | 20 | counts |
|--------------------|------|----------------------|---|----|----|----|--------|
| <i>AsCas12a</i> ON | TTTG | CTCTCAAGACCCACAATCCA |   |    |    |    | 145370 |
| OT1                | TCCT | TTCTCAAGACCCACAATCA  |   |    |    |    | 4      |

|                    | PAM  | 1                    | 5 | 10 | 15 | 20 | counts |
|--------------------|------|----------------------|---|----|----|----|--------|
| <i>LbCas12a</i> ON | TTTG | CTCTCAAGACCCACAATCCA |   |    |    |    | 63683  |
| OT1                | TCCT | TTCTCAAGACCCACAATCA  |   |    |    |    | 5      |

**NUDT16**

|                  | 20                   | 15 | 10 | 5 | 1 | PAM | counts |
|------------------|----------------------|----|----|---|---|-----|--------|
| <i>SpCas9</i> ON | GGGGTAGAGGTACTCTACAG |    |    |   |   | GGG | 9163   |
| OT1              | GGAGTGGAGGAACTCTACAG |    |    |   |   | TGG | 103    |
| OT2              | GGGGTGGAGCCACTCTACAG |    |    |   |   | AGG | 78     |
| OT3              | AGGGTAAAGATACTCTAAAG |    |    |   |   | TGG | 75     |
| OT4              | AGGGTAGAGGGACTCTCCAG |    |    |   |   | TGG | 23     |

|                    | PAM  | 1                    | 5 | 10 | 15 | 20 | counts |
|--------------------|------|----------------------|---|----|----|----|--------|
| <i>LbCas12a</i> ON | TTTA | GGGGTAGAGGTACTCTACAG |   |    |    |    | 74582  |
| OT1                | ATGG | AGGGTAAAGATACTCTAAAG |   |    |    |    | 17     |
| OT2                | TAGG | GGAGTGGAGGAACTCTACAG |   |    |    |    | 13     |
| OT3                | CACT | GGGGTGGAGCCACTCTACAG |   |    |    |    | 8      |
| OT4                | TGCA | AGGGTAGAGGGACTCTCCAG |   |    |    |    | 7      |
| OT5                | CTTA | GGGGTAGAAGTACTCTAGCA |   |    |    |    | 6      |

|                            | PAM  | 1                    | 5 | 10 | 15 | 20 | counts |
|----------------------------|------|----------------------|---|----|----|----|--------|
| <i>Un1Cas12f1_ge4.1</i> ON | TTTA | GGGGTAGAGGTACTCTACAG |   |    |    |    | 506575 |
| OT1                        | GTTA | GGGGTAGGGTAGGGTTAGG  |   |    |    |    | 3      |

**COL8A1**

|                  | 20                        | 15 | 10 | 5 | 1 | PAM | counts |
|------------------|---------------------------|----|----|---|---|-----|--------|
| <i>SpCas9</i> ON | GATTCATTCTCAGTGCCATG      |    |    |   |   | GGG | 223518 |
| OT1              | GATTC TTTCTCAGTGCCATG TGG |    |    |   |   |     | 1796   |
| OT2              | TATTCATTATCAGTGCAATG AGG  |    |    |   |   |     | 3      |

|                    | PAM  | 1                     | 5 | 10 | 15 | 20 | counts |
|--------------------|------|-----------------------|---|----|----|----|--------|
| <i>AsCas12a</i> ON | TTTA | GATTCATTCTCAGTGCCATG  |   |    |    |    | 166787 |
| OT1                | ATCA | GATTC TTTCTCAGTGCCATG |   |    |    |    | 11     |

|                    | PAM  | 1                     | 5 | 10 | 15 | 20 | counts |
|--------------------|------|-----------------------|---|----|----|----|--------|
| <i>LbCas12a</i> ON | TTTA | GATTCATTCTCAGTGCCATG  |   |    |    |    | 210421 |
| OT1                | ATCA | GATTC TTTCTCAGTGCCATG |   |    |    |    | 6      |

|                          | PAM   | 1                      | 5 | 10 | 15 | 20 | counts |
|--------------------------|-------|------------------------|---|----|----|----|--------|
| CasMINI_ <i>ge4.1</i> ON | TTTA  | GATTCATTCTCAGTGCCATG   |   |    |    |    | 346624 |
| OT1                      | CTTG  | TGTTTATTCTCAGTGCCAGC   |   |    |    |    | 44     |
| OT2                      | TTC A | GCTTTCATTCTCAGTGCC TGG |   |    |    |    | 60     |

**LNK1**

|                  | 20                   | 15 | 10 | 5 | 1 | PAM | counts |
|------------------|----------------------|----|----|---|---|-----|--------|
| <i>SpCas9</i> ON | CATACAGGGCTCTGTACCCA |    |    |   |   | GGG | 100432 |
| OT1              | GCCACAGGGCACTGTACCCA |    |    |   |   | AGG | 293    |
| OT2              | CAAACAGGGCTCTGTACCCA |    |    |   |   | TGA | 8      |
| OT3              | TATTCAGGGCTGTGTACCCA |    |    |   |   | AGG | 7      |

|                    | PAM  | 1                    | 5 | 10 | 15 | 20 | counts |
|--------------------|------|----------------------|---|----|----|----|--------|
| <i>LbCas12a</i> ON | TTTA | CATACAGGGCTCTGTACCCA |   |    |    |    | 210443 |
| OT1                | AGGT | GCCACAGGGCACTGTACCCA |   |    |    |    | 11     |

**Supplementary Figure 2. Genome-wide editing off-targets of different Cas nucleases. Related to Figure 2.**

**(a)** The represented fluorescence-activated cell sorting strategy by CasMINI in *HBB* locus in PEM-seq assay, with gate showing how the plasmid transfected-positive cells are gated for each sample and the number above the gate indicating the cell-sorted proportion. **(b)** Editing efficiency of the control, *PlmCas12e* and *PlmCas12e-R1-v2* at indicated loci detected by PEM-seq. Values from minimum to maximum are shown in the box plot (N = 12). The vertical line through the box is the median. Source data are provided as a Source Data file. **(c)** Number of off-target edits at the adjacent editing sites as detected by PEM-seq methods and identified through the PEM-Q pipeline. '-' means there was no detected off-target site. The indicated locus and Cas nuclease information are marked. **(d)** Sequence alignments and reads counts of PEM-seq detected genome-wide off-targets on *VEGFA\_2*, *COL8A1*, *NUDT16*, and *LNX1* locus. The off-targets sequence of *SpCas9*, *AsCas12a*, *LbCas12a*, CasMINI\_ *ge4.1* and *Un1Cas12f1\_ge4.1* at indicated locus were listed. Of note, the PAM and off-target counts were marked in the figure, with the translocation junctions within 100 bp from the detected off-target were counted.

Supplementary Fig.3

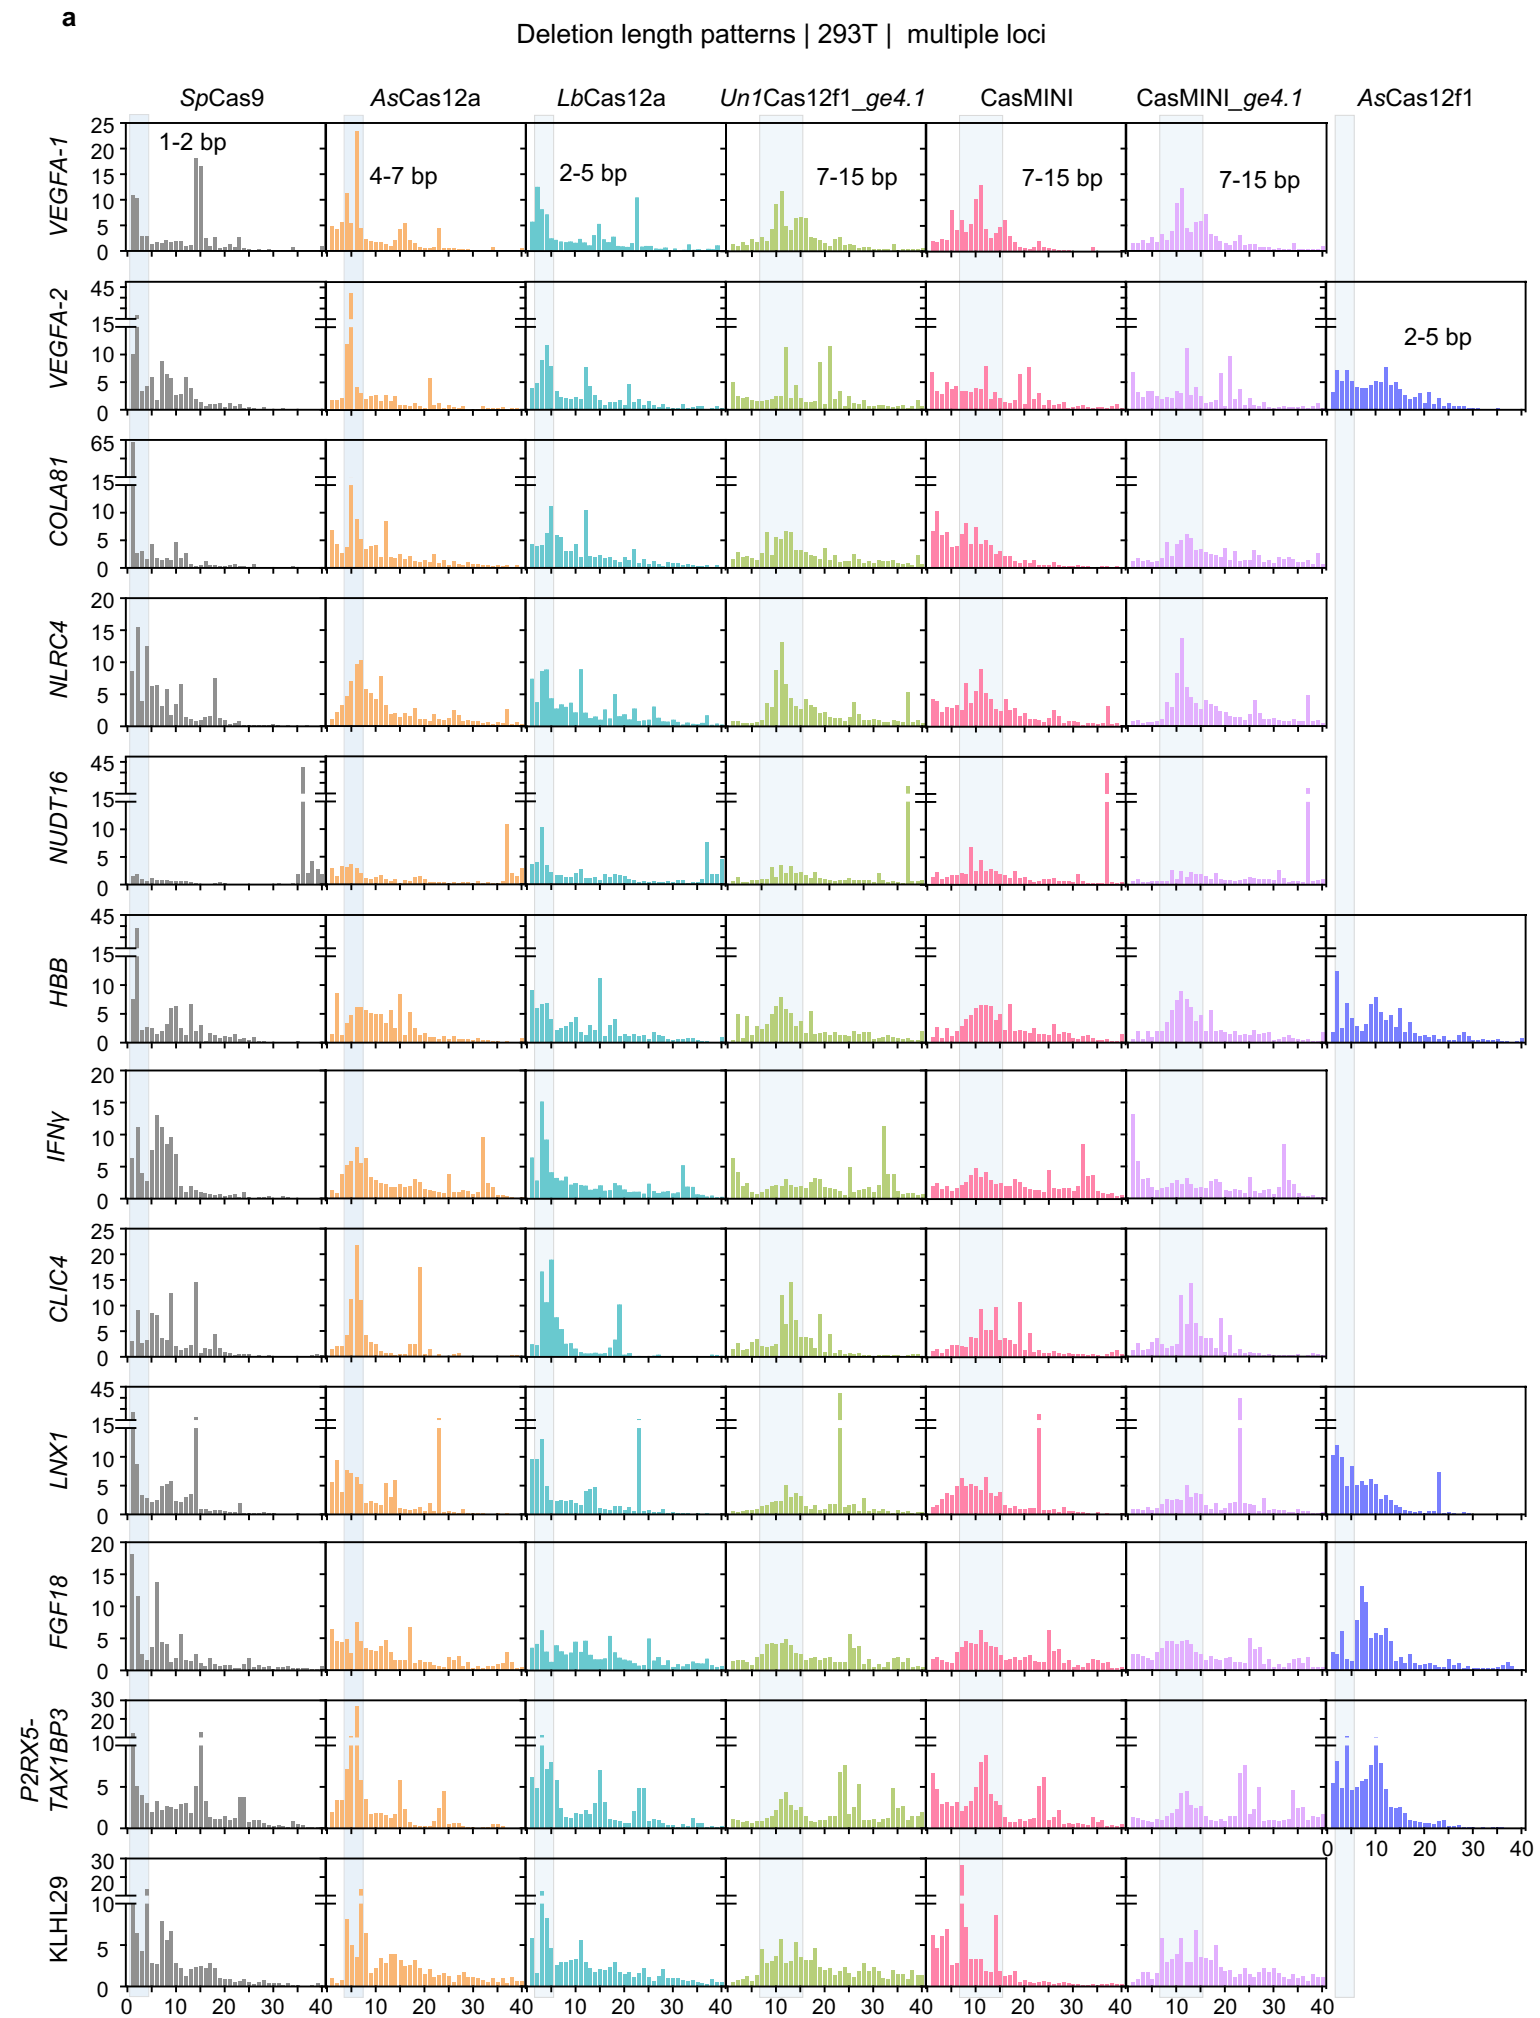

**Supplementary Figure 3. Cas12f nucleases caused a prevalent deletion accumulated at 2-11bp in length. Related to Figure 3.**

(a) Size and positional information of the deletions, within a length of 40 bp, generated by the indicated Cas nucleases at each indicated tested site. The vertical axis indicates the average ratio refers to the number of deletion fragments with the indicated length to the total number of deletion events. The most abundant deletion size for all tested nucleases is highlighted with a light blue shadow.

# Supplementary Fig.4

**a**

## Gene editing products | 293T | *FGF18*

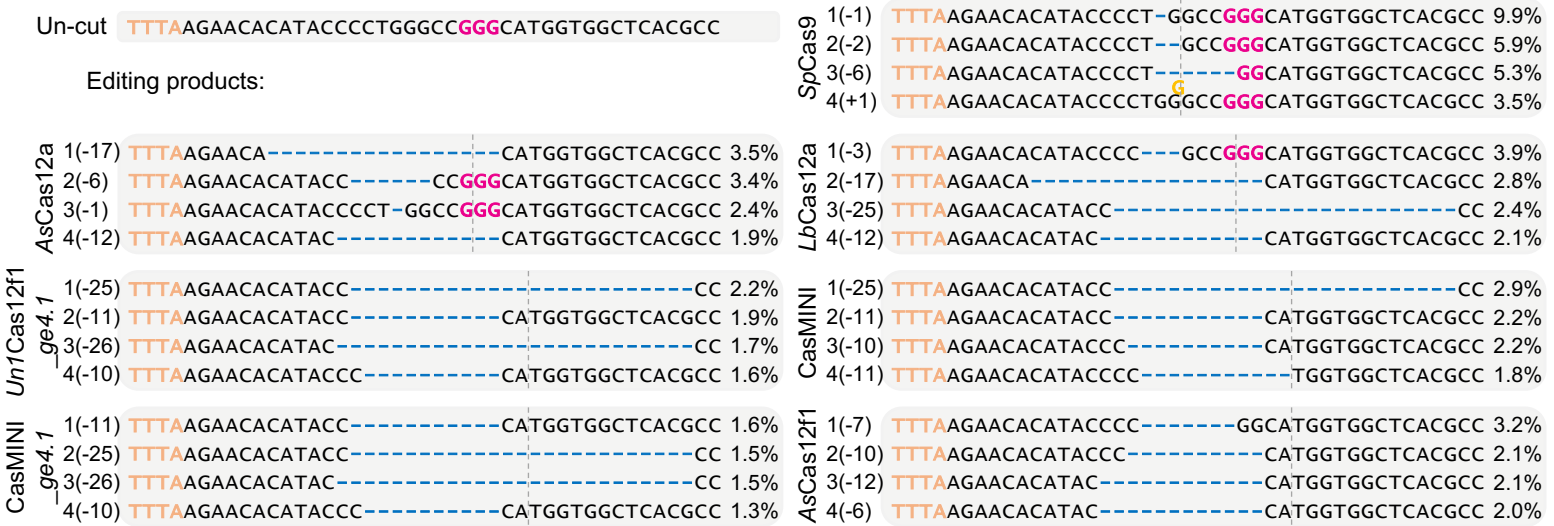

**b**

## Deletion junction distribution | 293T | *FGF18*

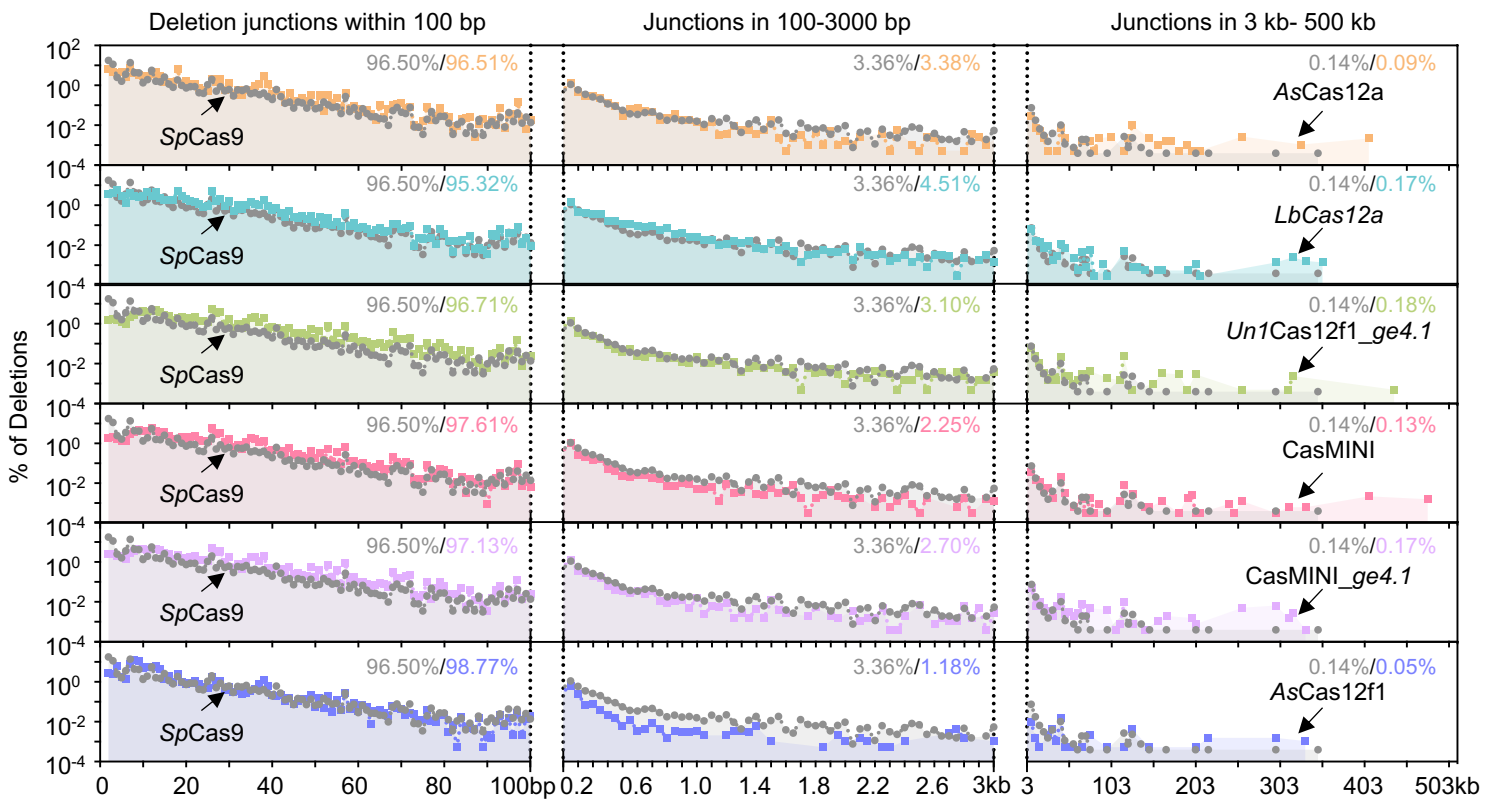

### Supplementary Figure 4. Repair outcomes and deletional junction's distribution at *FGF18* locus. Related to Figure 3.

(a) Top 4 most abundant editing events for indicated Cas nucleases at the *FGF18* locus detected by PEM-seq in HEK293T cells. The un-cut target sequence was shown on the top with PAM sequence for Cas12 and Cas9 was in orange and fuchsia, respectively. The deleted nucleotides were in dash and the inserted nucleotide were marked with yellow. The cut-sites were marked by the vertical dotted line and the mutation frequencies of indicated editing events were listed on right. (b) The deletion junction distribution patterns of indicated Cas nucleases in the *FGF18* locus. Left: junctions within 100bp from the cut site. Medium: junctions in 100bp to 3kb downstream from the cut site. Right: junctions in 3kb to 500kb downstream from the cut site. Please note that 1bp, 50 bp, and 5 kb bin-sizes are used for these three regions, respectively. The number below represents the distance from the cut site. The numbers in different colors at the above right of each box indicated the total proportion of corresponding Cas nuclease's deletions that occurred in this region.



# Supplementary Fig.5

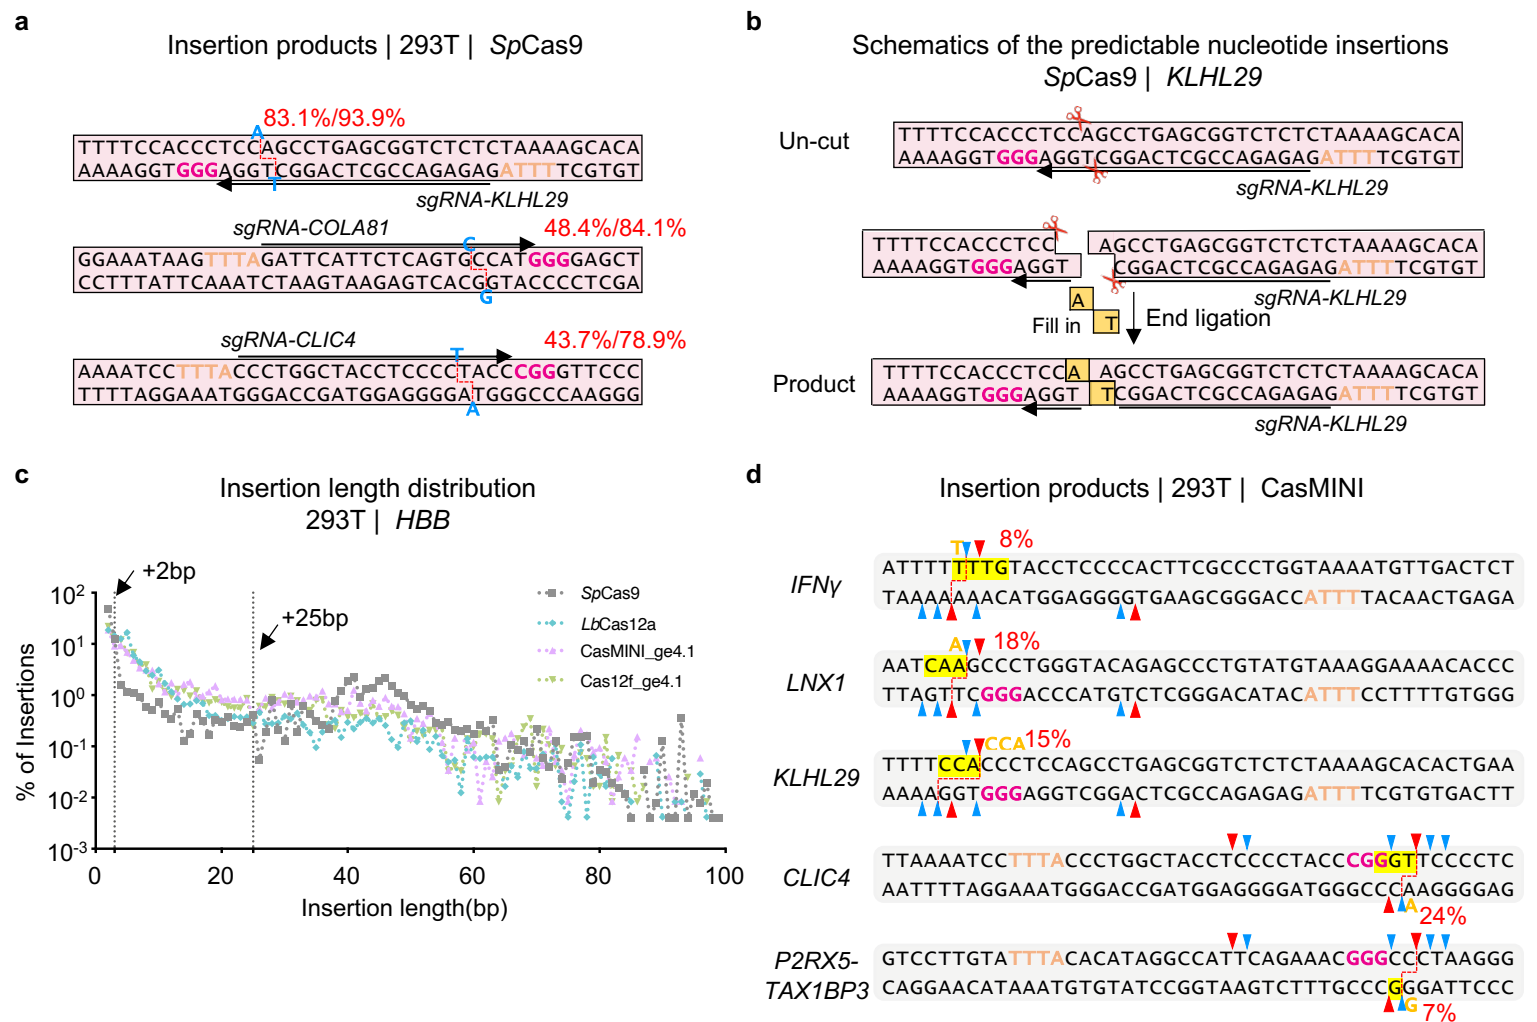

**Supplementary Figure 5. The insertion patterns of Cas12f and Cas9 nucleases. Related to Figure 4.**

(a) The most frequent insertion sequences induced by *SpCas9* at the *KLHL29*, *COL8A1*, and *CLIC4* loci detected by PEM-seq in HEK293T cells with PAM sequences for Cas12 and Cas9 was in orange or fuchsia, respectively. The cut-sites were marked by the red dotted line and the insertion bases were marked in blue. And the mutation frequency of indicated editing events was listed in red with the former and latter numbers indicating the percentage of special insertions relative to total editing events or total insertions, respectively. (b) The schematics of the predictable nucleotide insertions at the *KLHL29* locus. The cut-site were marked by the red scissors and the insertion bases were filled with yellow. (c) The insertion length distribution with the indicated length at the *HBB* locus in HEK293T cells. Total insertion junctions are plotted on the log scale. The different colors indicate different Cas nucleases, respectively. Black arrows mark 2-bp insertions and 25-bp insertions. (d) The most frequent insertion sequences induced by CasMINI at the *IFN $\gamma$* , *LNX1*, *KLHL29*, *CLIC4*, and *P2RX5-TAX1BP3* loci detected by PEM-seq in HEK293T cells with PAM sequences for Cas12 and Cas9 in orange and fuchsia, respectively. Red and blue arrowheads indicate the major and minor cleavage sites and the insertion bases were marked in yellow. Then the predicted most frequent blunt end for the PAM-distal segment cut-site was marked by the red dotted line. And the mutation frequency of indicated insertions relative to the total insertions was listed in red.

**Supplementary Table 1.** The proportion of GFP negative cells in Cas nuclease-GFP disruption assay.

| Cas nucleases                      |       | Non-target |       |       | Target site 1 |       |       | Target site 2 |       |       |
|------------------------------------|-------|------------|-------|-------|---------------|-------|-------|---------------|-------|-------|
|                                    |       | R1         | R2    | R3    | R1            | R2    | R3    | R1            | R2    | R3    |
| <i>SpCas9</i>                      | Day5  | 0.64%      | 0.98% | 0.50% | 52.2%         | 39.1% | 49.0% | 58.1%         | 44.5% | 42.4% |
|                                    | Day10 | 0.41%      | 0.81% | 0.28% | 94.8%         | 95.5% | 92.4% | 94.4%         | 93.1% | 89.9% |
| <i>AsCas12a</i>                    | Day5  | 0.38%      | 0.53% | 0.39% | 23.8%         | 21.3% | 23.2% | 14.9%         | 11.3% | 9.94% |
|                                    | Day10 | 0.18%      | 0.62% | 0.29% | 75.5%         | 79.1% | 68.4% | 41.8%         | 50.2% | 35.4% |
| <i>LbCas12a</i>                    | Day5  | 0.38%      | 0.83% | 0.44% | 35.5%         | 26.3% | 34.0% | 35.2%         | 25.5% | 26.2% |
|                                    | Day10 | 0.15%      | 0.42% | 0.28% | 78.6%         | 84.2% | 72.2% | 79.1%         | 84.2% | 67.9% |
| <i>Plm</i><br><i>Cas12e</i>        | Day5  | 1.07%      | 1.17% | 0.80% | 7.24%         | 6.94% | 7.02% | 1.88%         | 1.73% | 2.13% |
|                                    | Day10 | 0.72%      | 0.76% | 0.72% | 15.7%         | 16.5% | 16.8% | 1.47%         | 1.78% | 2.09% |
| <i>PlmCas</i><br><i>12e-R1-v2</i>  | Day5  | 1.10%      | 0.82% | 0.94% | 14.3%         | 13.5% | 13.3% | 6.40%         | 6.02% | 6.79% |
|                                    | Day10 | 0.75%      | 0.70% | 0.52% | 47.2%         | 45.9% | 44.9% | 14.2%         | 14.1% | 14.5% |
| <i>UnlCas12</i><br><i>fl_ge4.1</i> | Day5  | 0.30%      | 0.26% | 0.25% | 8.83%         | 9.16% | 6.20% | 9.34%         | 8.65% | 6.30% |
|                                    | Day10 | 0.31%      | 0.30% | 0.36% | 20.5%         | 20.5% | 14.0% | 25.6%         | 23.0% | 16.8% |
| CasMINI                            | Day5  | 0.45%      | 0.58% | 0.42% | 4.12%         | 4.81% | 2.69% | 30.1%         | 22.0% | 21.3% |
|                                    | Day10 | 0.24%      | 0.28% | 0.28% | 12.5%         | 14.2% | 8.56% | 55.0%         | 62.4% | 47.8% |
| CasMINI<br><i>_ge4.1</i>           | Day5  | 0.36%      | 0.68% | 0.26% | 7.96%         | 6.92% | 7.29% | 13.8%         | 11.2% | 9.10% |
|                                    | Day10 | 0.53%      | 0.35% | 0.32% | 21.0%         | 28.8% | 17.1% | 25.9%         | 30.4% | 22.2% |
| <i>As</i><br><i>Cas12fl</i>        | Day5  | 0.41%      | 0.68% | 0.42% | 1.52%         | 1.54% | 1.05% | 2.38%         | 1.88% | 1.74% |
|                                    | Day10 | 0.14%      | 0.47% | 0.25% | 3.49%         | 3.06% | 1.66% | 7.09%         | 6.40% | 3.72% |

**Supplementary Table 2.** Bio-primer, Red-primer, and gRNA sequences used in PEM-seq assay.

| Site                          | Bio-primer                  |                      | Nested-primer            |                      |
|-------------------------------|-----------------------------|----------------------|--------------------------|----------------------|
| <b>VEGFA_1</b>                | CTTCCCAAAGGACCCCAGTCACTCCAG |                      | GACACACTGTGGCCCCCTGTG    |                      |
| gRNA sequence                 | Cas9                        | GCTCTCAAGACCCACAATCC | Cas12a                   | CTCTCAAGACCCACAATCCA |
|                               | Cas12e                      | GGCCTGGATTGTGGGTCTTG | Cas12f                   |                      |
| <b>VEGFA_2</b>                | CCACCTCTGTCTTATCTCTCCATG    |                      | GAAGGGATGTGGTGCATTTGG    |                      |
| gRNA sequence                 | Cas9                        | GCTCTCAAGACCCACAATCC | Cas12a                   | CTCTCAAGACCCACAATCCA |
|                               | Cas12e                      | GGCCTGGATTGTGGGTCTTG | Cas12f                   |                      |
| <b>COL8A1</b>                 | CAGAGGAATGGCAAAGCCCTATAAG   |                      | GGTCAAGGTTGAAAGAAGCC     |                      |
| gRNA sequence                 | Cas9                        | GATTCATTCTCAGTGCCATG | Cas12a                   | GATTCATTCTCAGTGCCATG |
|                               | Cas12e                      | TTCTCAGTGCCATGGGGAGC | Cas12f                   |                      |
| <b>NLRC4</b>                  | GCAATTGGGCTTATATGCTCCAGGAG  |                      | GGCCATTTTGCTTGCCCAATC    |                      |
| gRNA sequence                 | Cas9                        | GAGGGAGACACAAGTTGATA | Cas12a                   | GAGGGAGACACAAGTTGATA |
|                               | Cas12e                      | CATTTTAGAGGGAGACACAA | Cas12f                   |                      |
| <b>NUDT16</b>                 | GAGAAGTATAGAAGAGCCAGGTAGG   |                      | CCCACAAAGAGAAACCATGTG    |                      |
| gRNA sequence                 | Cas9                        | GGGGTAGAGGTACTCTACAG | Cas12a                   | GGGGTAGAGGTACTCTACAG |
|                               | Cas12e                      | GGCTTGGGCAAATGAGGCTC | Cas12f                   |                      |
| <b>HBB</b>                    | GACTTTTATGCCAGCCCTGGCTCC    |                      | GACAGCCGTACCTGTCCTTGG    |                      |
| gRNA sequence                 | Cas9                        | TCCCTCTAAGATATATCTCT | Cas12a                   | TACTGATGGTATGGGGCCAA |
|                               | Cas12e                      | AACCCTCAGCCCTCCCTCTA | Cas12f                   |                      |
| <b>IFN<math>\gamma</math></b> | GTGACAGATAGGCAGGGATGATAG    |                      | GTGCCATTCTGGTGGGATTC     |                      |
| gRNA sequence                 | Cas9                        | TGTACCTCCCCACTTCGCCC | Cas12a                   | CCAGGGCGAAGTGGGGAGGT |
|                               | Cas12e                      | CCCTGGTAAAATGTTGACTC | Cas12f                   |                      |
| <b>CLIC4</b>                  | CCTAACAGGCTACTCTTCTGTAG     |                      | GGATCAAGGATAGACAAGGTATAG |                      |
| gRNA sequence                 | Cas9                        | CCCTGGCTACCTCCCCTACC | Cas12a                   | CCCTGGCTACCTCCCCTACC |
|                               | Cas12e                      | CCTCTCTTTAATTTGGAGAC | Cas12f                   |                      |
| <b>LNXI</b>                   | GGCCAGAACCTTGCTCTTTGAG      |                      | GGAAATATCCATTGAATTGGCCTG |                      |
| gRNA sequence                 | Cas9                        | CATACAGGGCTCTGTACCCA | Cas12a                   | CATACAGGGCTCTGTACCCA |
|                               | Cas12e                      | TTTACATACAGGGCTCTGTA | Cas12f                   |                      |
| <b>FGF18</b>                  | GAGCTTGGTCAGGGAAGACAGCC     |                      | GGACGAAGGATGGGGAAAGAAG   |                      |
| gRNA sequence                 | Cas9                        | AGAACACATACCCCTGGGCC | Cas12a                   | AGAACACATACCCCTGGGCC |
|                               | Cas12e                      | TAAAAGCACCCAGGTGCTC  | Cas12f                   |                      |
| <b>P2RX5-TAX1BP3</b>          | CAGATTAATGAAGCGTGAGACAC     |                      | CGCCGAGATTTGACTCCTGGAG   |                      |
| gRNA sequence                 | Cas9                        | CACATAGGCCATTCAGAAAC | Cas12a                   | CACATAGGCCATTCAGAAAC |
|                               | Cas12e                      | GAAACGGGCCCTAAGGCCT  | Cas12f                   |                      |
| <b>KLHL29</b>                 | GCTACACGCGCTCATCTCTGCCTCC   |                      | CAGGATTACTGCAGCACCTCC    |                      |
| gRNA sequence                 | Cas9                        | GAGAGACCGCTCAGGCTGGA | Cas12a                   | GAGAGACCGCTCAGGCTGGA |
|                               | Cas12e                      | GTGTGCTTTTAGAGAGACCG | Cas12f                   |                      |

**Supplementary Table 3.** Vector integrations detected by PEM-seq in this study.

| <i>Locus</i>                  | <i>LbCas12a</i> | <i>SpCas9</i> | <i>CasMINI</i> | <i>AsCas12a</i> | <i>CasMINI_ge4.1</i> | <i>AsCas12fl</i> | <i>UnlCas12fl_ge4.1</i> |
|-------------------------------|-----------------|---------------|----------------|-----------------|----------------------|------------------|-------------------------|
| <i>VEGFA_1</i>                | 12,275          | 10,478        | 3,547          | 5,651           | 3,336                | —                | 6,545                   |
| <i>VEGFA_2</i>                | 3,588           | 8,366         | 1,884          | 2,560           | 3,793                | 390              | 2,142                   |
| <i>COL8A1</i>                 | 2,143           | 3,070         | 1,324          | 2,482           | 1,249                | —                | 1,526                   |
| <i>NLRC4</i>                  | 3,945           | 6,722         | 2,318          | 1,820           | 1,723                | —                | 3,132                   |
| <i>NUDT16</i>                 | 2,948           | 14,024        | 1,324          | 3,946           | 742                  | —                | 631                     |
| <i>HBB</i>                    | 1,597           | 2,807         | 743            | 697             | 965                  | 652              | 841                     |
| <i>IFN<math>\gamma</math></i> | 3,082           | 4,748         | 959            | 3,254           | 2,539                | —                | 1,204                   |
| <i>CLIC4</i>                  | 1,297           | 3,386         | 1,512          | 2,264           | 1,199                | —                | 3,015                   |
| <i>LNXI</i>                   | 1,024           | 3,240         | 493            | 1,067           | 1,426                | 550              | 1,853                   |
| <i>FGF18</i>                  | 964             | 1,823         | 1,220          | 1,156           | 1,839                | 912              | 1,962                   |
| <i>P2RX5-TAX1BP3</i>          | 903             | 2,386         | 2,511          | 1,988           | 2,224                | 2,942            | 1,323                   |
| <i>KLHL29</i>                 | 2,230           | 1,086         | 755            | 2,315           | 813                  | —                | 2,530                   |

Each number indicated the vector integration junctions' number per 100k on-target indels for indicated CRISPR-Cas nuclease at respective locus detected by PEM-seq cloning from the on-target region. K means thousand.
